# Supplementary material for: Starvation induces rapid degradation of selective autophagy receptors by endosomal microautophagy
Source: PubMed Central journal article supplement — J Cell Biol. 2018 Oct 1;217(10):3640–55. doi: 10.1083/jcb.201711002 (PMC6168274; doi:10.1083/jcb.201711002), 2018-10-01
Supplement: JCB_201711002_sm.pdf [file JCB_201711002_sm.pdf]

## Supplemental material

Mejlvang et al., <https://doi.org/10.1083/jcb.201711002>

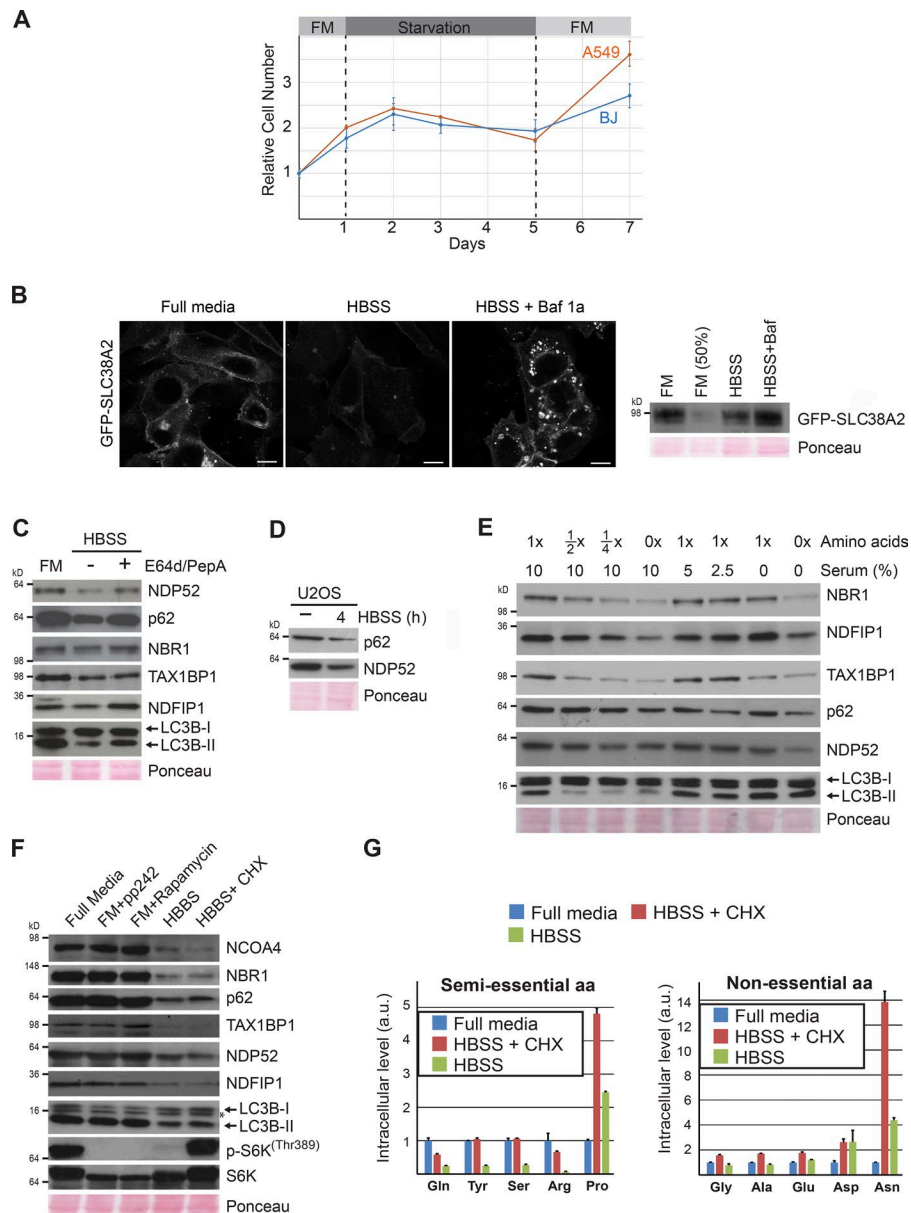

**Figure S1. Amino acid starvation triggers a rapid lysosomal degradation response independently of mTOR.** **(A)** Growth curves for BJ and A549 cells cultured for 24 h in FM and then starved for 4 d in HBSS before returning to FM for another 2 d. Error bars represent SD of a technical triplicate. One representative experiment of two replicas is shown. **(B)** Fluorescence microscopy and Western blot analysis of GFP-SLC38A2 degradation after 4-h starvation in HBSS. Clones with doxycycline (Dox)-inducible GFP-tagged SLC38A2 were generated in MEF p62 KO background cell lines. Expression was induced for 24 h using 500 ng/ml doxycycline. This experiment was performed two independent times with similar results. **(C)** Western blot analyses comparing expression levels of indicated proteins in A549 cells grown in FM or starved in HBSS for 1 h with/without inhibitors of lysosomal proteases (10  $\mu$ g/ml E64d and 10  $\mu$ g/ml Pepstatin A). The experiment was performed two independent times with similar results. **(D)** Western blot analyses comparing expression levels of p62 and NDP52 in U2OS cells grown in FM or starved in HBSS for 4 h. This experiment was performed two independent times with similar results. **(E)** Western blot analyses assessing the effect of 4-h amino acid versus serum starvation in A549 cells. The experiment was performed three independent times with similar results. **(F)** Western blot analyses of expression levels of indicated proteins in BJ cells treated as indicated for 1 h. pp242 (250 nM) and rapamycin (250 nM) were used to inhibit mTOR. Cycloheximide (CHX, 50  $\mu$ g/ml) was used to block protein synthesis. This experiment was performed three independent times with similar results. **(G)** Quantification of free pools of intracellular amino acids by HPLC-MS/MS in BJ cells starved for 1 h with/without CHX (50  $\mu$ g/ml). This experiment was performed three independent times with similar results. Error bars represent SD of a technical triplicate.

| A BJ cells             |              |                   |                     | A549 cells             |              |                   |
|------------------------|--------------|-------------------|---------------------|------------------------|--------------|-------------------|
| Protein<br>(gene name) | Stvd:<br>Fed | Stvd+Baf:<br>Stvd | Stvd:Fed<br>in A549 | Protein<br>(gene name) | Stvd:<br>Fed | Stvd:Fed<br>in BJ |
| NCOA4                  | -2,84        | NaN               | -2,99               | TMPRSS11D              | -8,81        | NaN               |
| CALCOCO2               | -2,36        | NaN               | -2,04               | GINM1                  | -5,46        | NaN               |
| TAX1BP1                | -2,36        | NaN               | -1,98               | NCOA4                  | -2,99        | -2,84             |
| SQSTM1                 | -2,30        | 1,23              | -2,24               | EXOSC6                 | -2,95        | NaN               |
| NBR1                   | -2,05        | 1,80              | -1,30               | UBE2D2/3               | -2,82        | NaN               |
| TMEM200A               | -2,00        | NaN               | NaN                 | FTH1                   | -2,80        | -0,89             |
| AXL                    | -1,98        | NaN               | -0,31               | NDFIP1                 | -2,73        | NaN               |
| CALCOCO1               | -1,94        | NaN               | NaN                 | HSPA6                  | -2,71        | NaN               |
| APLP2                  | -1,79        | 0,35              | -1,00               | C3                     | -2,57        | NaN               |
| TNIP1                  | -1,78        | NaN               | NaN                 | DDI2                   | -2,50        | NaN               |
| TMEM59                 | -1,69        | 1,34              | NaN                 | FTL                    | -2,45        | -0,60             |
| GABARAPL2              | -1,67        | 1,12              | NaN                 | SQSTM1                 | -2,24        | -2,30             |
| CRIM1                  | -1,67        | NaN               | NaN                 | CALCOCO2               | -2,04        | -2,36             |
| SLC38A2                | -1,58        | 1,37              | -0,94               | IVNS1ABP               | -2,02        | NaN               |
| IL6ST                  | -1,58        | NaN               | NaN                 | TAX1BP1                | -1,98        | -2,36             |
| MXRA8                  | -1,58        | 1,43              | NaN                 | TCEB2                  | -1,92        | -0,18             |
| TNFRSF10B              | -1,53        | 1,00              | NaN                 | ABLIM1                 | -1,88        | NaN               |
| LRP10                  | -1,49        | 1,47              | NaN                 | RBP4                   | -1,84        | 4,53              |
| RNF149                 | -1,47        | 1,36              | NaN                 | MED20                  | -1,84        | NaN               |
| TNFRSF10D              | -1,33        | NaN               | NaN                 | CD99L2                 | -1,77        | NaN               |
| TPRG1L                 | -1,30        | 0,54              | NaN                 | CHMP1A                 | -1,69        | NaN               |
| GJA1                   | -1,23        | 0,72              | NaN                 | LAPTM4A                | -1,66        | NaN               |
| DCI:EC11               | -1,22        | NaN               | NaN                 | PSAP                   | -1,58        | -1,05             |
| SERINC1                | -1,12        | 1,20              | -1,38               | C1orf85                | -1,51        | NaN               |
| CASP3                  | -1,11        | NaN               | NaN                 | LARS2                  | -1,42        | NaN               |
| PIP4K2B                | -1,08        | NaN               | NaN                 | CEP164                 | -1,40        | NaN               |
| PCDHGB7                | -1,07        | 1,30              | NaN                 | SERINC1                | -1,38        | -1,12             |
| PSAP                   | -1,05        | 0,57              | -1,58               | SLC39A14               | -1,36        | -0,20             |
| SLC2A1                 | -1,02        | NaN               | -0,12               | ZNF622                 | -1,34        | NaN               |
| CYFIP2                 | -1,01        | NaN               | 0,15                | CTSD                   | -1,32        | -0,18             |
| SLC7A1                 | -1,00        | NaN               | -0,57               | GPX8                   | -1,32        | NaN               |
| JAK1                   | -1,00        | NaN               | -0,41               | NBR1                   | -1,30        | -2,05             |
| TM9SF4                 | -0,98        | NaN               | -0,10               | MAP1LC3B               | -1,27        | -0,95             |
| TGFBR2                 | -0,96        | NaN               | -0,65               | HDCC2                  | -1,26        | NaN               |
| C1GALT1C1              | -0,96        | 0,61              | NaN                 | HS2ST1                 | -1,21        | NaN               |
| MAP1LC3B               | -0,95        | NaN               | -1,27               | CHM:CHML               | -1,21        | NaN               |
| DCBLD2                 | -0,93        | NaN               | -0,32               | SCD                    | -1,18        | -0,23             |
| VPS53                  | -0,92        | NaN               | -0,07               | LOXL2                  | -1,14        | -0,21             |
| FTH1                   | -0,89        | 0,76              | -2,80               | VPS28                  | -1,12        | NaN               |
| CDH11                  | -0,88        | -0,46             | -0,02               | SFSWAP                 | -1,10        | NaN               |
| NTMT1                  | -0,88        | 0,03              | NaN                 | TRIM32                 | -1,07        | -0,64             |
| SLC38A1                | -0,83        | 0,63              | -0,41               | CENPE                  | -1,07        | NaN               |
| ATG9A                  | -0,80        | NaN               | 0,15                | TRUB1                  | -1,06        | NaN               |
| CDK11A/B               | -0,80        | NaN               | NaN                 | RHOF                   | -1,04        | NaN               |
| APIP                   | -0,79        | NaN               | NaN                 | HMGCS1                 | -1,03        | -0,66             |
| ASL                    | -0,79        | NaN               | NaN                 | MPHOSPH8               | -1,03        | NaN               |
| ZNF598                 | -0,78        | NaN               | NaN                 | CCDC37                 | -1,02        | NaN               |
| PKN1                   | -0,77        | -0,37             | -0,31               | TRAFD1                 | -1,01        | NaN               |
| TMF1                   | -0,76        | NaN               | -0,32               | GGA3                   | -1,01        | NaN               |
| ATP8B1                 | -0,73        | NaN               | NaN                 | APLP2                  | -1,00        | -1,79             |

Figure S2. **The top 50 most degraded proteins in BJ and A549 cells upon 4-h amino acid starvation based on SILAC experiments.** BJ cells (left) and A549 cells (right). For BJ cells, data from the starvation plus bafilomycin A1 treatment are included. NaN, not any number (below the detection range); Stvd, starved.

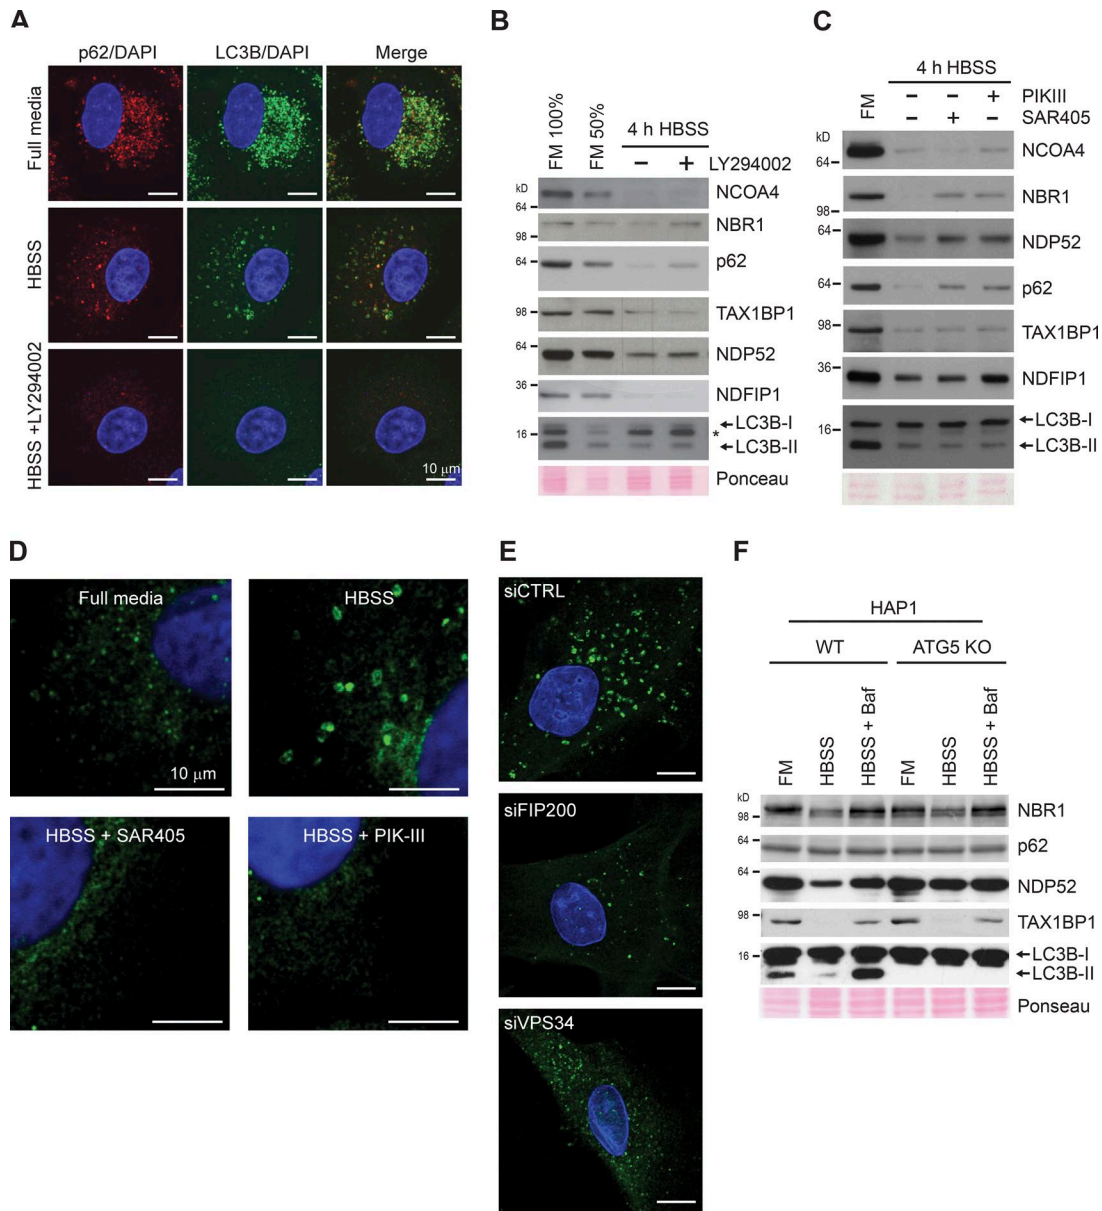

Figure S3. **Macroautophagy does not play a major role in the immediate autophagic response to amino acid starvation.** (A) Representative images showing p62 and LC3B in A549 cells stained by immunofluorescence after 1-h starvation in the presence/absence of the PI3K-inhibitor LY294002 (25  $\mu$ M). (B) Western blot analyses of expression levels of indicated proteins in A549 cells grown in FM or starved for 4 h in the presence or absence of the PI3K-inhibitor LY294002 (25  $\mu$ M). (C) Western blot analyses of expression levels of indicated proteins in BJ cells grown in FM or starved for 4 h in the presence or absence of the PI3K-inhibitors SAR405 (5  $\mu$ M) or PIK-III (2.5  $\mu$ M). (D) Representative images showing LC3B in BJ cells stained by immunofluorescence after 1-h starvation in the presence/absence of the PI3K-inhibitors SAR405 (5  $\mu$ M) or PIK-III (2.5  $\mu$ M). (E) Representative immunofluorescence images of the cellular distribution of endogenous LC3B in BJ cells treated with indicated siRNA and then starved for 1 h in HBSS. These analyses were done in parallel to the Western analysis shown in Fig. 5 D. (F) Western blot of expression levels of NBR1, p62, and TAX1BP1 in WT HAP1 and ATG5 KO HAP1 cells after 4 h of starvation. Bafilomycin A1 (Baf) was used at 200 nM to inhibit lysosomal protein degradation.

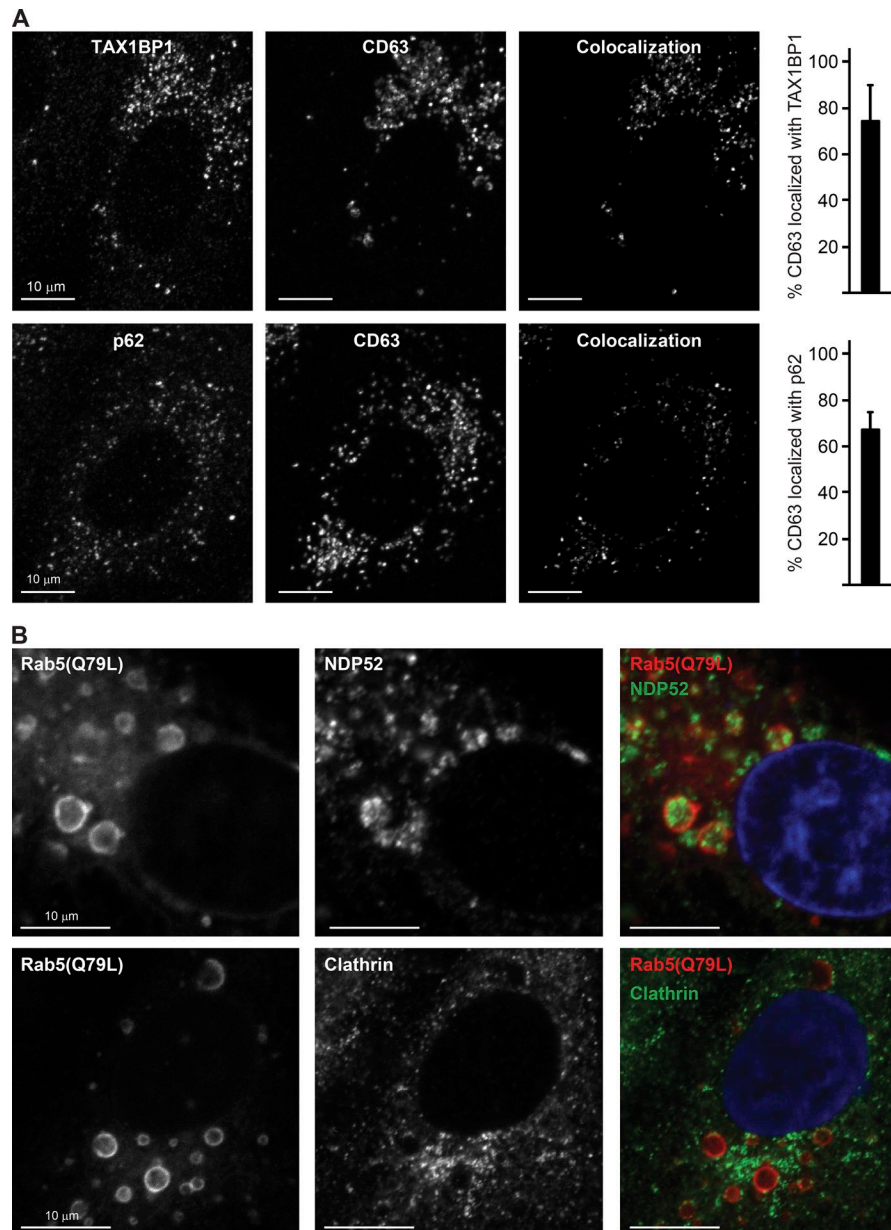

Figure S4. **Substrates of the immediate autophagic response to starvation are associated with the endosomal network. (A)** Left: Representative immunofluorescence microscopy images of endogenous CD63, p62, and TAX1BP1 in A549 cells. Colocalization of TAX1BP1/p62 with CD63 was determined and visualized using Volocity. Right: Manders correlation coefficients showing percentage of CD63 signal colocalizing with TAX1BP1 and p62, respectively. Error bars represent SD. **(B)** Representative immunofluorescence images of the cellular distribution of NDP52 and clathrin heavy chain in A549 cells transfected with mCherry-RAB5(Q79L).

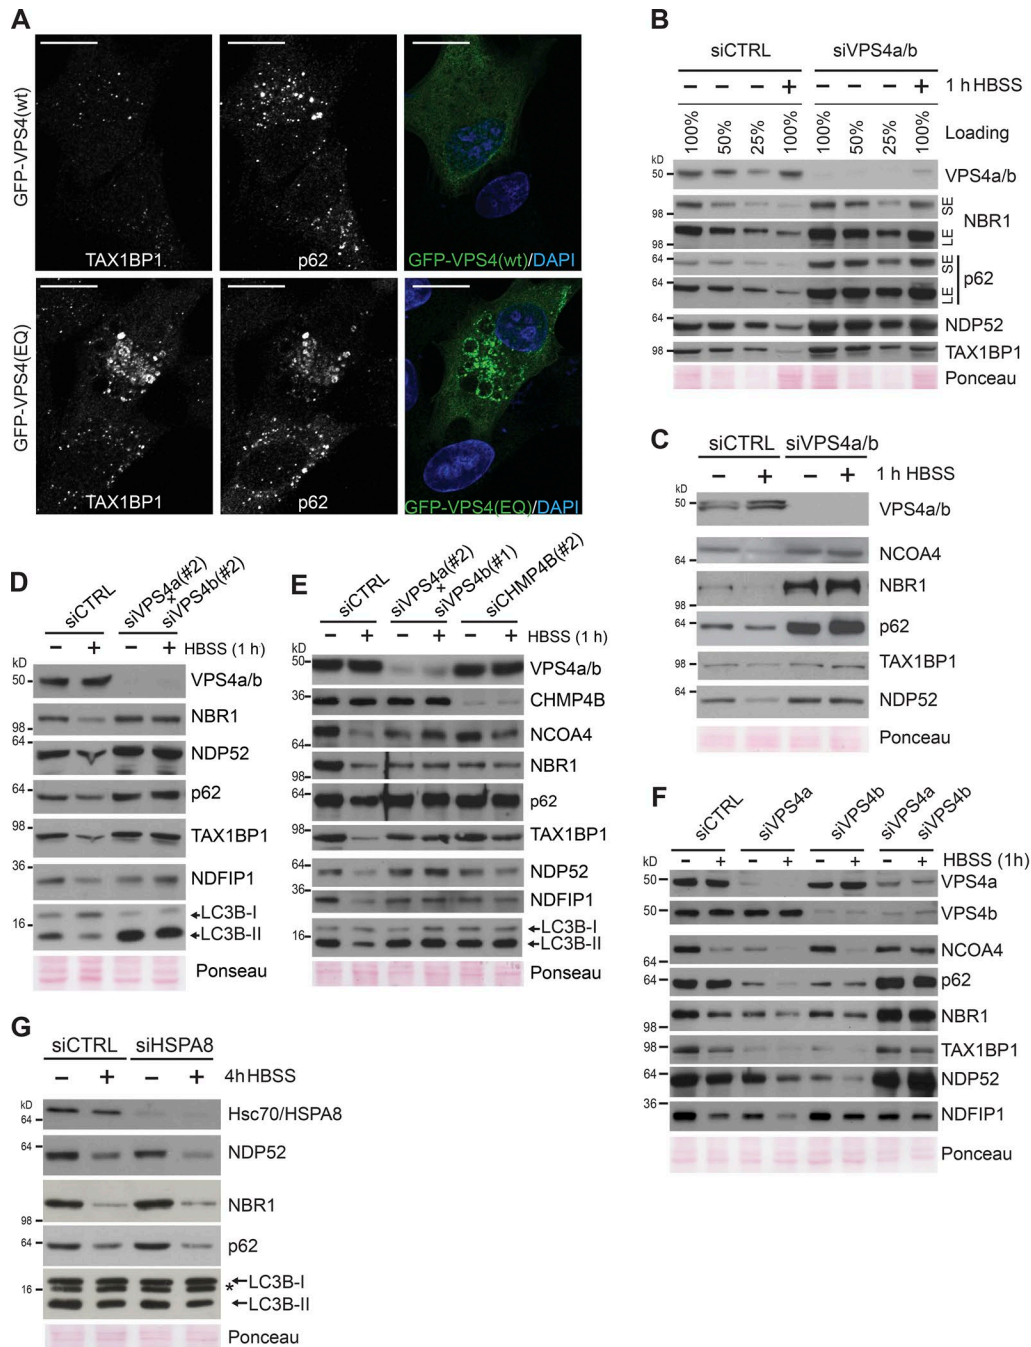

Figure S5. **The immediate autophagic response to amino acid starvation depends on VPS4 but not HSPA8.** (A) BJ cells were transfected with either WT GFP-VPS4 or ATPase-defective GFP-VPS4(EQ). After 48 h, cells were fixed and stained for p62 and TAX1BP1. Bars, 20  $\mu$ m. The experiment was performed two independent times with similar results. (B) Western blot analyses assessing the immediate autophagic response to 1-h starvation in VPS4a/b siRNA-depleted BJ cells. LE, long exposure; SE, short exposure. (C) Western blot analyses assessing the immediate autophagic response to 1-h starvation in VPS4a/b-depleted A549 cells. In both A and B, cells were starved 72 h after transfection. (D) Western blot analyses assessing the immediate autophagic response to 1-h starvation in BJ cells depleted of VPS4 using alternative siRNAs targeting VPS4a and VPS4b. (E) Western blot analyses assessing the immediate autophagic response to 1-h starvation in BJ cells depleted of CHMP4b using alternative siRNAs. (F) Western blot analyses assessing the immediate autophagic response to 1-h starvation in BJ cells depleted of VPS4a, VPS4b, and both VPS4a and VPS4b. (G) Western blot analysis of the response to 4-h starvation in HSPA8-depleted BJ cells. Starvation was induced 48 h after siRNA transfection. This experiment was performed three independent times with similar results.

Data S1 is a separate Excel file showing the relative quantification of proteins in BJ cells grown in full media versus starved for 4 h.

Data S2 is a separate Excel file showing the relative quantification of proteins in A549 cells grown in full media versus starved for 4 h.

Data S3 is a separate Excel file showing the relative quantification of proteins in BJ cells starved for 4 h in the absence or presence of bafilomycin A1.
